# Supplementary material for: Low-dose urokinase thrombolytic therapy for patients with acute intermediate-high-risk pulmonary embolism: A retrospective cohort study
Source: PubMed Central journal article supplement (PMC7997002; doi:10.1371/journal.pone.0248603), 2021-03-26
Supplement: pone.0248603.s003.pdf [file pone.0248603.s003.pdf]

# 福建省立医院伦理委员会

## 临床科研试验审批件

伦审科研第 (K2019-02-023) 号

|                                                                                                               |                                                                                                                                                                                                                                                                                                                                                                  |                                                                                                                                                                                                             |           |                 |
|---------------------------------------------------------------------------------------------------------------|------------------------------------------------------------------------------------------------------------------------------------------------------------------------------------------------------------------------------------------------------------------------------------------------------------------------------------------------------------------|-------------------------------------------------------------------------------------------------------------------------------------------------------------------------------------------------------------|-----------|-----------------|
| 审<br>评<br>项<br>目                                                                                              | 项 目 名 称                                                                                                                                                                                                                                                                                                                                                          | 小剂量尿激酶溶栓治疗在中高危肺栓塞患者中有效性及安全性的回顾性队列研究                                                                                                                                                                         |           |                 |
|                                                                                                               | 课 题 来 源                                                                                                                                                                                                                                                                                                                                                          | 国际合作课题 <input type="checkbox"/> 国家级科研课题 <input type="checkbox"/> 省级科研课题 <input type="checkbox"/><br>福州市科研课题 <input type="checkbox"/> 医院科研课题 <input type="checkbox"/> 其他 <input checked="" type="checkbox"/> |           |                 |
|                                                                                                               | 课 题 编 号                                                                                                                                                                                                                                                                                                                                                          | /                                                                                                                                                                                                           | 起 止 时 间   | 2019.03-2020.08 |
|                                                                                                               | 科 室                                                                                                                                                                                                                                                                                                                                                              | 重症医学科                                                                                                                                                                                                       | 课 题 负 责 人 | 翁翠莲             |
|                                                                                                               | 职 称                                                                                                                                                                                                                                                                                                                                                              | 副主任医师                                                                                                                                                                                                       | 联 系 电 话   | 13606031594     |
| 受<br>理<br>审<br>查<br>文<br>件                                                                                    | 伦理申请表<br>研究方案                                                                                                                                                                                                                                                                                                                                                    |                                                                                                                                                                                                             |           |                 |
| 审查方式                                                                                                          |                                                                                                                                                                                                                                                                                                                                                                  | 快速审查                                                                                                                                                                                                        |           |                 |
| 结<br>论                                                                                                        | <p>根据卫计委《涉及人的生物医学研究伦理审查办法》(2016)、食品药品监督管理局《药物临床试验质量管理规范》(2003)、《医疗器械临床试验质量管理规范》(2016)、世界医学会《赫尔辛基宣言》(2013)、以及国际医学科学组织委员会《人体生物医学研究国际伦理指南》(2002)的伦理原则, 经本伦理委员会审查, 同意按照研究方案开展研究。</p> <p>该研究进行过程中是否接受伦理委员会的持续审查 <input type="checkbox"/> 是 <input checked="" type="checkbox"/> 否</p> <p>审查频度为研究批准之日起 <input type="checkbox"/> 6 个月 <input type="checkbox"/> 12 个月</p> |                                                                                                                                                                                                             |           |                 |
| 伦理委员会 (盖章) <br>2019年2月22日 |                                                                                                                                                                                                                                                                                                                                                                  |                                                                                                                                                                                                             |           |                 |

地址: 福州市东街 134 号 邮编: 350001 电话: 0591-88216023
